# Supplementary material
Source: Springer Nature journal article supplement (https://www.springermedizin.de/resource/supplementary/13561_2011_13_MOESM1_ESM.pdf/9687242)
Supplement: MOESM1 [file 9687242]

*Suppose you have a serious disease which leads to immediate death if uncured. Two alternative treatments are available:*

*Under treatment A, you live for an additional 15 years and have serious migraine on one day per week.*

*Under treatment B, you die immediately with a probability of 33%. With a probability of 67% you live for an additional 20 years and have no migraine.*

*Which treatment do you choose?*
